# Supplementary material for: Alloying nickel and cobalt with iron on ZSM-5 for tuning competitive hydrogenation reactions for selective one-pot conversion of furfural to gamma-valerolactone
Source: Royal Society of Chemistry journal article supplement (doi:10.1039/d2dt02986c), 2022-01-01
Supplement: d2dt02986c1.pdf [file d2dt02986c1.pdf]

## Supporting Information

### **Alloying nickel and cobalt with iron on ZSM-5 for tuning competitive hydrogenation reactions for selective one-pot conversion of furfural to gamma-valerolactone**

Yuewen Shao<sup>a</sup>, Mingzhu Guo<sup>a</sup>, Mengjiao Fan<sup>a</sup>, Kai Sun<sup>a</sup>, Guoming Gao<sup>b</sup>, Chao Li<sup>a</sup>,  
Félix Mérimé Bkangmo Kontchouo<sup>a</sup>, Lijun Zhang<sup>a</sup>, Shu Zhang<sup>b</sup>, Xun Hu<sup>a,\*</sup>

<sup>a</sup>School of Material Science and Engineering, University of Jinan, Jinan, 250022, P. R. China.

<sup>b</sup>Joint International Research Laboratory of Biomass Energy and Materials, College of Materials Science and Engineering, Nanjing Forestry University, Nanjing, 210037, P. R. China.

\*Corresponding author. Tel. /fax: +86-531-89736201; E-mail: [xun.hu@outlook.com](mailto:xun.hu@outlook.com) (X. Hu).

Number of Tables: 6

Number of Scheme: 1

Number of Figures: 2

Number of Pages: 11

**Table S1** Distribution of the products in hydrogenation of furfural versus catalyst loading<sup>a</sup>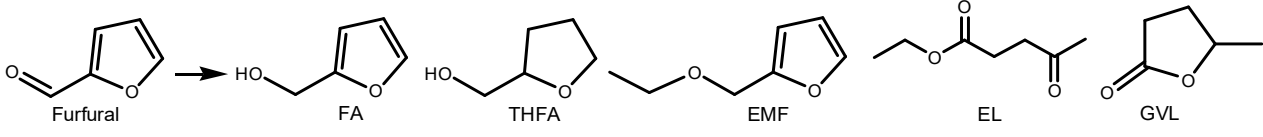

The reaction scheme shows furfural (a furan ring with an aldehyde group) being hydrogenated to five products: FA (furfuryl alcohol), THFA (tetrahydrofurfuryl alcohol), EMF (ethyl methyl furfuryl ether), EL (ethyl lactate), and GVL (gamma-valerolactone).

| Entry | Catalysts      | Catalyst loading (mg) | Con. (%) | Yield (%) |       |      |      |      |
|-------|----------------|-----------------------|----------|-----------|-------|------|------|------|
|       |                |                       |          | F A       | THF A | EMF  | EL   | GVL  |
| 1     | Ni/ZSM-5       | 40                    | 100.0    | 0.0       | 36.6  | 0.0  | 25.8 | 28.5 |
| 2     | Co/ZSM-5       | 40                    | 100.0    | 0.0       | 0.0   | 0.0  | 21.0 | 60.7 |
| 3     | Fe/ZSM-5       | 40                    | 36.7     | 0.0       | 0.0   | 0.6  | 17.5 | 2.5  |
| 4     | Ni-Fe/ZSM-5    | 40                    | 100.0    | 0.0       | 0.0   | 18.4 | 38.9 | 39.0 |
| 5     | Co-Fe/ZSM-5    | 40                    | 100.0    | 0.0       | 0.9   | 20.0 | 41.2 | 36.3 |
| 6     | Ni-Co/ZSM-5    | 40                    | 100.0    | 0.0       | 68.7  | 0.0  | 5.4  | 18.5 |
| 7     | Ni-Co-Fe/ZSM-5 | 40                    | 100.0    | 0.0       | 1.8   | 5.5  | 9.7  | 75.0 |
| 8     | Ni/ZSM-5       | 80                    | 100.0    | 0.0       | 40.1  | 0.0  | 17.7 | 28.1 |
| 9     | Co/ZSM-5       | 80                    | 100.0    | 0.0       | 0.0   | 0.0  | 7.9  | 63.2 |
| 10    | Fe/ZSM-5       | 80                    | 56.1     | 0.0       | 0.0   | 0.0  | 24.2 | 5.4  |
| 11    | Ni-Fe/ZSM-5    | 80                    | 100.0    | 0.0       | 2.1   | 2.1  | 41.4 | 46.3 |
| 12    | Co-Fe/ZSM-5    | 80                    | 100.0    | 0.0       | 0.0   | 1.0  | 38.3 | 42.5 |
| 13    | Ni-Co/ZSM-5    | 80                    | 100.0    | 0.0       | 71.8  | 0.0  | 2.6  | 24.0 |
| 14    | Ni-Co-Fe/ZSM-5 | 80                    | 100.0    | 0.0       | 2.9   | 0.0  | 2.7  | 73.9 |
| 15    | Ni/ZSM-5       | 100                   | 100.0    | 0.0       | 46.6  | 0.0  | 15.8 | 25.8 |
| 16    | Co/ZSM-5       | 100                   | 100.0    | 0.0       | 0.0   | 0.0  | 5.5  | 54.5 |
| 17    | Fe/ZSM-5       | 100                   | 60.4     | 0.0       | 0.0   | 0.0  | 29.1 | 8.1  |
| 18    | Ni-Fe/ZSM-5    | 100                   | 100.0    | 0.0       | 4.9   | 0.0  | 41.6 | 54.7 |
| 19    | Co-Fe/ZSM-5    | 100                   | 100.0    | 0.0       | 0.0   | 0.0  | 40.1 | 52.0 |
| 20    | Ni-Co/ZSM-5    | 100                   | 100.0    | 0.0       | 67.8  | 0.0  | 1.4  | 18.4 |
| 21    | Ni-Co-Fe/ZSM-5 | 100                   | 100.0    | 0.0       | 2.6   | 0.0  | 2.0  | 73.7 |

<sup>a</sup>Reaction conditions: T = 150 °C; t = 10 h;  $P_{H_2}$  = 4 MPa (at room temperature); stirring speed = 600 rpm; reactant: 0.4 mmol; ethanol: 5 mL.

**Table S2** Distribution of the products in hydrogenation of furfural versus reaction medium<sup>a</sup>

| Entry | Catalysts      | Solvents         | Con. (%) | Yield (%) |          |                   |                   |      |     |      |
|-------|----------------|------------------|----------|-----------|----------|-------------------|-------------------|------|-----|------|
|       |                |                  |          | FA        | THF<br>A | AMF               | AL                | GVL  | CPO | CPL  |
| 1     | Ni/ZSM-5       | Isopropanol      | 100.0    | 0.0       | 89.3     | 0.0 <sup>b</sup>  | 0.0 <sup>c</sup>  | 9.1  | –   | –    |
| 2     | Co/ZSM-5       | Isopropanol      | 100.0    | 0.0       | 2.9      | 79.1 <sup>b</sup> | 0.0 <sup>c</sup>  | 5.9  | –   | –    |
| 3     | Fe/ZSM-5       | Isopropanol      | 63.2     | 0.0       | 0.0      | 11.7 <sup>b</sup> | 12.8 <sup>c</sup> | 5.4  | –   | –    |
| 4     | Ni-Fe/ZSM-5    | Isopropanol      | 100.0    | 57.9      | 3.9      | 36.2 <sup>b</sup> | 0.0 <sup>c</sup>  | 0.0  | –   | –    |
| 5     | Co-Fe/ZSM-5    | Isopropanol      | 100.0    | 21.4      | 2.9      | 59.5 <sup>b</sup> | 3.2 <sup>c</sup>  | 10.3 | –   | –    |
| 6     | Ni-Co/ZSM-5    | Isopropanol      | 100.0    | 0.0       | 89.1     | 1.7 <sup>b</sup>  | 0.0 <sup>c</sup>  | 0.0  | –   | –    |
| 7     | Ni-Co-Fe/ZSM-5 | Isopropanol      | 100.0    | 0.0       | 3.0      | 61.4 <sup>b</sup> | 0.3 <sup>c</sup>  | 5.6  | –   | –    |
| 8     | Ni/ZSM-5       | Methanol         | 100.0    | 0.0       | 17.6     | 0.0               | 50.3 <sup>d</sup> | 17.9 | –   | –    |
| 9     | Co/ZSM-5       | Methanol         | 100.0    | 0.0       | 0.0      | 0.0               | 5.0 <sup>d</sup>  | 55.5 | –   | –    |
| 10    | Fe/ZSM-5       | Methanol         | 22.6     | 0.0       | 0.0      | 0.0               | 12.5 <sup>d</sup> | 0.0  | –   | –    |
| 11    | Ni-Fe/ZSM-5    | Methanol         | 100.0    | 0.0       | 0.7      | 0.0               | 78.7 <sup>d</sup> | 17.3 | –   | –    |
| 12    | Co-Fe/ZSM-5    | Methanol         | 100.0    | 0.0       | 0.0      | 0.0               | 65.5 <sup>d</sup> | 21.4 | –   | –    |
| 13    | Ni-Co/ZSM-5    | Methanol         | 100.0    | 0.0       | 27.9     | 0.0               | 13.8 <sup>d</sup> | 35.6 | –   | –    |
| 14    | Ni-Co-Fe/ZSM-5 | Methanol         | 100.0    | 0.0       | 1.3      | 0.0               | 3.7 <sup>d</sup>  | 56.0 | –   | –    |
| 15    | Ni/ZSM-5       | H <sub>2</sub> O | 100.0    | 0.0       | 12.1     | –                 | 6.4 <sup>e</sup>  | 4.4  | 3.1 | 5.2  |
| 16    | Co/ZSM-5       | H <sub>2</sub> O | 100.0    | 0.0       | 12.9     | –                 | 4.0 <sup>e</sup>  | 12.0 | 2.0 | 27.1 |
| 17    | Fe/ZSM-5       | H <sub>2</sub> O | 63.1     | 0.0       | 0.0      | –                 | 0.0 <sup>e</sup>  | 0.0  | 0.0 | 0.0  |
| 18    | Ni-Fe/ZSM-5    | H <sub>2</sub> O | 100.0    | 0.0       | 11.1     | –                 | 7.5 <sup>e</sup>  | 7.6  | 3.7 | 30.5 |
| 19    | Co-Fe/ZSM-5    | H <sub>2</sub> O | 100.0    | 0.0       | 1.2      | –                 | 4.2 <sup>e</sup>  | 11.7 | 2.1 | 37.5 |
| 20    | Ni-Co/ZSM-5    | H <sub>2</sub> O | 100.0    | 0.0       | 33.9     | –                 | 3.1 <sup>e</sup>  | 9.6  | 1.5 | 5.2  |
| 21    | Ni-Co-Fe/ZSM-5 | H <sub>2</sub> O | 100.0    | 0.0       | 22.6     | –                 | 3.9 <sup>e</sup>  | 8.2  | 1.9 | 20.2 |

<sup>a</sup>Reaction conditions: T = 150 °C; t = 10 h; P<sub>H<sub>2</sub></sub> = 4 MPa (at room temperature); stirring speed = 600 rpm; catalyst: 60 mg; reactant: 0.4 mmol; solvent: 5 mL. AMF represents 2-alkoxymethyl-furan; AL represents alkyl levulinate.

<sup>b</sup>2-Isopropoxymethyl-furan was formed in isopropanol. <sup>c</sup>Isopropyl levulinate was formed in isopropanol. <sup>d</sup>Methyl levulinate was formed in methanol.

<sup>e</sup>1,4-Pentanediol was formed in water.

**Table S3** Distribution of the products in hydrogenation of various reactants<sup>a</sup>

| Entry | Catalysts      | Reactants | Con. (%) | Yield (%) |          |     |      |      |
|-------|----------------|-----------|----------|-----------|----------|-----|------|------|
|       |                |           |          | F<br>A    | THF<br>A | EMF | EL   | GVL  |
| 1     | Ni/ZSM-5       | FA        | 100.0    | –         | 46.5     | 0.0 | 17.9 | 22.5 |
| 2     | Co/ZSM-5       | FA        | 100.0    | –         | 0.0      | 0.0 | 10.3 | 61.9 |
| 3     | Fe/ZSM-5       | FA        | 100.0    | –         | 0.0      | 0.0 | 72.3 | 13.7 |
| 4     | Ni-Fe/ZSM-5    | FA        | 100.0    | –         | 1.7      | 0.0 | 46.8 | 35.7 |
| 5     | Co-Fe/ZSM-5    | FA        | 100.0    | –         | 0.0      | 0.7 | 42.0 | 45.2 |
| 6     | Ni-Co/ZSM-5    | FA        | 100.0    | –         | 62.6     | 0.0 | 3.8  | 17.7 |
| 7     | Ni-Co-Fe/ZSM-5 | FA        | 100.0    | –         | 0.0      | 0.0 | 3.9  | 66.6 |
| 8     | Ni/ZSM-5       | EL        | 41.1     | –         | –        | –   | –    | 38.3 |
| 9     | Co/ZSM-5       | EL        | 96.1     | –         | –        | –   | –    | 75.2 |
| 10    | Fe/ZSM-5       | EL        | 14.0     | –         | –        | –   | –    | 13.2 |
| 11    | Ni-Fe/ZSM-5    | EL        | 40.1     | –         | –        | –   | –    | 39.0 |
| 12    | Co-Fe/ZSM-5    | EL        | 35.7     | –         | –        | –   | –    | 33.5 |
| 13    | Ni-Co/ZSM-5    | EL        | 93.7     | –         | –        | –   | –    | 71.1 |
| 14    | Ni-Co-Fe/ZSM-5 | EL        | 95.1     | –         | –        | –   | –    | 84.7 |

<sup>a</sup>Reaction conditions: T = 150 °C; t = 10 h;  $P_{H_2}$  = 4 MPa (at room temperature); stirring speed = 600 rpm; catalyst: 60 mg; reactant: 0.4 mmol; ethanol: 5 mL.

**Table S4** Distribution of the products in hydrogenation of furfural via transfer hydrogenation<sup>a</sup>

| Entry | Catalysts      | Con. (%) | Yield (%) |          |      |      |      |
|-------|----------------|----------|-----------|----------|------|------|------|
|       |                |          | F<br>A    | THF<br>A | EMF  | EL   | GVL  |
| 1     | Ni/ZSM-5       | 76.7     | 0.0       | 0.0      | 1.2  | 41.2 | 16.2 |
| 2     | Co/ZSM-5       | 99.3     | 0.0       | 0.0      | 13.2 | 49.2 | 19.0 |
| 3     | Fe/ZSM-5       | 43.3     | 0.0       | 0.0      | 0.7  | 26.6 | 3.9  |
| 4     | Ni-Fe/ZSM-5    | 66.2     | 0.0       | 0.0      | 9.8  | 34.6 | 11.8 |
| 5     | Co-Fe/ZSM-5    | 70.9     | 0.0       | 0.0      | 9.5  | 40.8 | 6.8  |
| 6     | Ni-Co/ZSM-5    | 83.8     | 0.0       | 0.0      | 32.4 | 25.7 | 13.0 |
| 7     | Ni-Co-Fe/ZSM-5 | 98.7     | 0.0       | 0.0      | 33.5 | 41.9 | 23.9 |

<sup>a</sup>Reaction conditions: T = 150 °C; t = 14 h;  $P_{N_2}$  = 4 MPa (at room temperature); stirring speed = 600 rpm; catalyst: 60 mg; reactant: 0.4 mmol; ethanol: 5 mL.

**Table S5** Kinetic study for the conversion of various reactants over Ni-Co-Fe/ZSM-5 catalyst<sup>a</sup>

| Entry | T (°C) | Reaction rate for furfural (mmol·g <sub>cat</sub> <sup>-1</sup> ·h <sup>-1</sup> ) | T (°C) | Reaction rate for FA (mmol·g <sub>cat</sub> <sup>-1</sup> ·h <sup>-1</sup> ) | T (°C) | Reaction rate for EL (mmol·g <sub>cat</sub> <sup>-1</sup> ·h <sup>-1</sup> ) |
|-------|--------|------------------------------------------------------------------------------------|--------|------------------------------------------------------------------------------|--------|------------------------------------------------------------------------------|
| 1     | 120    | 23.1                                                                               | 120    | 5.7                                                                          | 140    | 1.7                                                                          |
| 2     | 140    | 43.3                                                                               | 140    | 16.1                                                                         | 160    | 4.9                                                                          |
| 3     | 160    | 78.5                                                                               | 160    | 27.9                                                                         | 180    | 9.7                                                                          |

<sup>a</sup>Reaction conditions: P<sub>H2</sub> = 4 MPa, stirring speed = 800 rpm, catalyst: 20 mg, reactant: 6 mmol; ethanol: 20 g.

**Table S6** The abundance of various functionalities recorded over Ni/ZSM-5, Ni-Co/ZSM-5 and Ni-Co-Fe/ZSM-5 catalysts<sup>a</sup>

| Entry | Catalysts          | Functional groups                  | Wavenumber<br>r<br>(cm <sup>-1</sup> ) | Abundance<br>(a.u.) | Ratio of other functional<br>groups to C-O-C |
|-------|--------------------|------------------------------------|----------------------------------------|---------------------|----------------------------------------------|
| 1     | Ni/ZSM-5           | C=O                                | 1673                                   | 2.2293              | 3.55                                         |
| 2     |                    | C=C                                | 1568                                   | 1.4910              | 2.38                                         |
| 3     |                    | C-O                                | 1156                                   | 0.6273              | 1.00                                         |
| 4     |                    | C-O-C                              | 1020                                   | 1.1358              | 1.81                                         |
| 5     |                    | -(CH <sub>2</sub> ) <sub>n</sub> - | 755                                    | 1.2385              | 1.97                                         |
| 6     | Ni-Co/ZSM-5        | C=O                                | 1673                                   | 2.0551              | 4.04                                         |
| 7     |                    | C=C                                | 1568                                   | 1.1597              | 2.28                                         |
| 8     |                    | C-O                                | 1157                                   | 0.5088              | 1.00                                         |
| 9     |                    | C-O-C                              | 1020                                   | 0.9949              | 1.96                                         |
| 10    |                    | -(CH <sub>2</sub> ) <sub>n</sub> - | 755                                    | 1.2008              | 2.36                                         |
| 11    | Ni-Co-<br>Fe/ZSM-5 | C=O                                | 1673                                   | 2.1466              | 3.53                                         |
| 12    |                    | C=C                                | 1567                                   | 1.0979              | 1.81                                         |
| 13    |                    | C-O                                | 1157                                   | 0.6076              | 1.00                                         |
| 14    |                    | C-O-C                              | 1020                                   | 1.2038              | 1.98                                         |
| 15    |                    | -(CH <sub>2</sub> ) <sub>n</sub> - | 755                                    | 1.6765              | 2.76                                         |

<sup>a</sup>The functional groups were obtained from in-situ FT-IR spectra at 150 °C in Fig. 5 (d). The abundance of functional groups was measured based on the absorbance of peaks.

**Table S6** Distribution of the products for the hydrogenation of various reactants to GVL over various catalysts

| Entry | Catalysts                                        | Reaction conditions                                                             | Con. (%) | Yield (%) | Ref.          |
|-------|--------------------------------------------------|---------------------------------------------------------------------------------|----------|-----------|---------------|
| 1     | Zr-Beta and Al-MFI nanosheets                    | T = 120 °C; t = 48 h; furfural                                                  | 100.0    | 78.0      | 38            |
| 2     | PDVB-IL polymer and Co/TiO <sub>2</sub>          | One step: T = 150 °C, t = 12 h; two step: T = 130 °C, t = 6 h; furfuryl alcohol | 100.0    | 69.0      | 39            |
| 3     | Au/ZrO <sub>2</sub> catalyst combined with ZSM-5 | T = 120 °C; t = 24 h; hemicellulose                                             | 100.0    | 61.5      | 40            |
| 4     | Sn-Al-Beta Heteropolyacid                        | T = 180 °C; t = 24 h; furfural                                                  | 100.0    | 60.5      | 41            |
| 5     | supported on Zr-Beta zeolite                     | T = 160 °C; t = 24 h; furfural                                                  | 100.0    | 70.0      | 42            |
| 6     | DUT-67(Hf)                                       | T = 180 °C; t = 24 h; furfural                                                  | 100.0    | 87.1      | 43            |
| 7     | Zr-Al-beta                                       | T = 190 °C; t = 48 h; furfural                                                  | 100.0    | 35.0      | 44            |
| 8     | Ni-Co-Fe/ZSM-5                                   | T = 150 °C; t = 14 h; furfural                                                  | 100.0    | 85.7      | In this study |



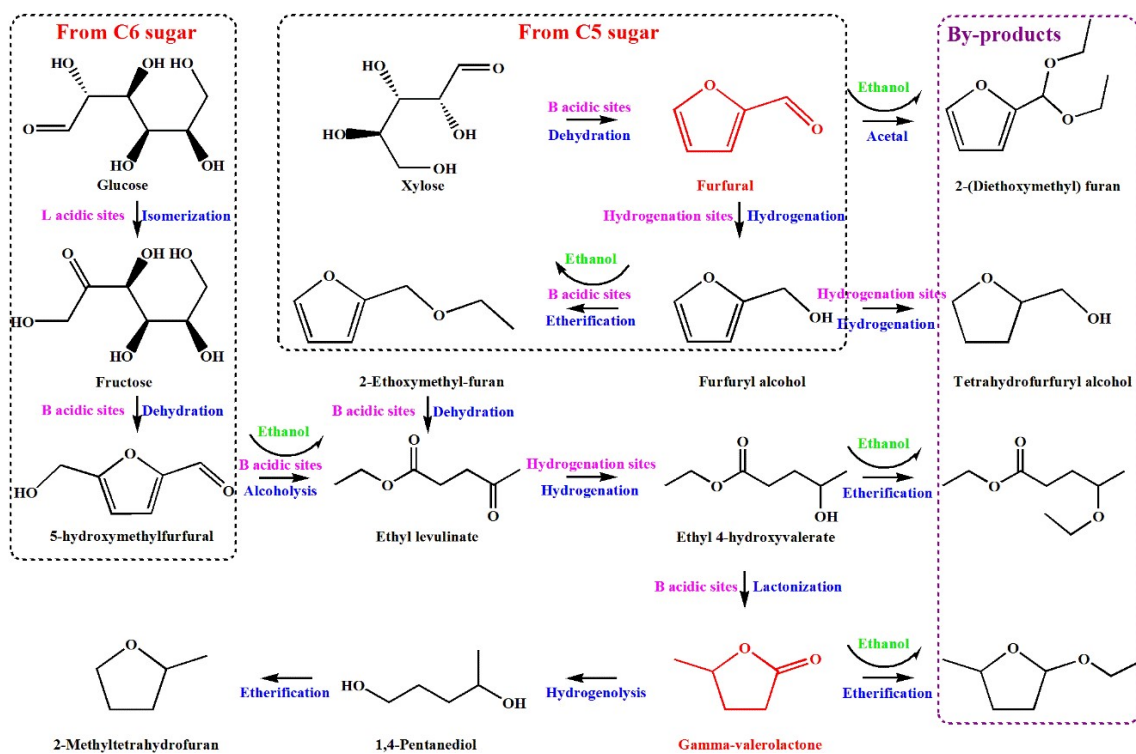

**Scheme S1** Proposed reaction pathways for conversion of the sugars-derived furans.

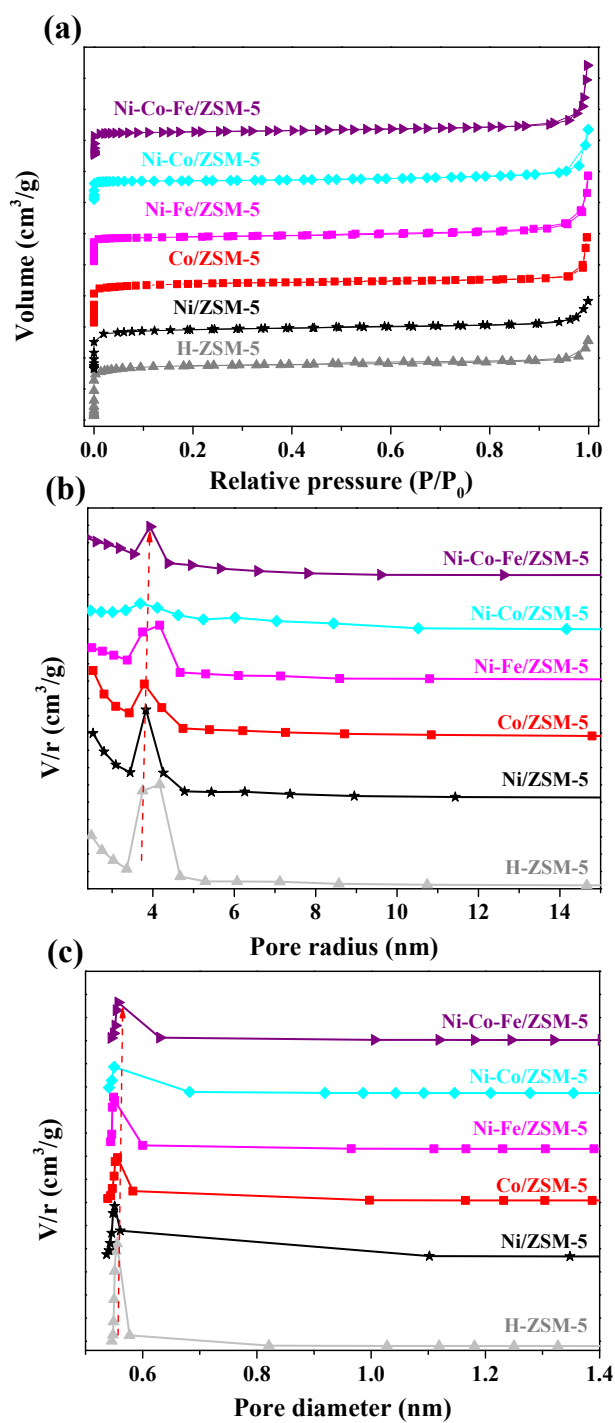

**Fig. S1** (a) N<sub>2</sub> adsorption/desorption isotherms; (b) and (c) pore size distribution curves of Ni, Co and Fe supported on ZSM-5 catalysts.

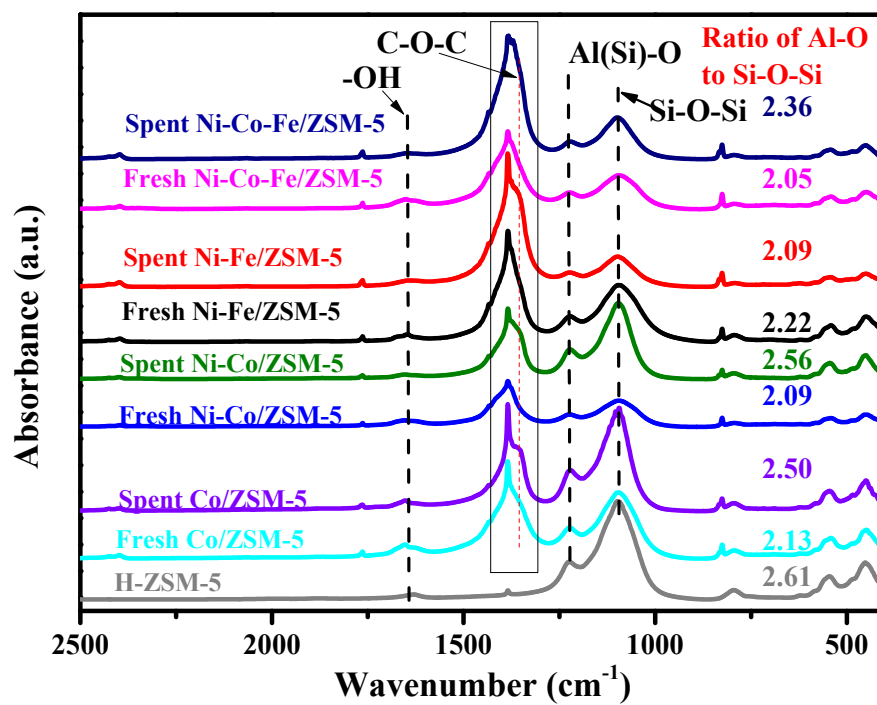

**Fig. S2** FT-IR spectra of the used and the fresh metal supported on H-ZSM-5 catalysts.
